# Supplementary material
Source: PubMed Central journal article supplement (PMC4874568)
Supplement: NIHMS778404-supplement-1.pdf [file NIHMS778404-supplement-1.pdf]

## Supplementary Tables

**Supplementary Table S1. RNA-seq analyses of global exon splicing events.** *BRCA1* exon 11 mutant cell lines expressed higher mRNA and protein levels of the *BRCA1-Δ11q* alternative splice variant compared with cell lines with *BRCA1* mutations located outside of exon 11 (Fig. 1C). To investigate the possibility that *BRCA1-Δ11q* expression was higher in exon 11 mutant cell lines because of a global increase in alternative exon splicing, we carried out RNA-seq analyses and measured the number of unique exon-exon junctions (predicted to be a result of alternative exon splicing) in comparisons of cell lines with exon 11 mutations (SUM149PT, UWB1.289) versus those with mutations located outside of exon 11 (HCC1395, MDA-MB-436). Table 1 show comparisons carried out and the number of unique splicing events found in each cell line in that particular comparison. In conclusion, there were no differences in the number of unique events in comparisons between cell lines with *BRCA1* mutations inside versus outside of exon 11. Therefore, we do not believe the cell lines with exon 11 mutations have an overall increased level of global splicing.

| Comparisons            | Unique in exon 11 | Unique in non-exon 11 |
|------------------------|-------------------|-----------------------|
| SUM149PT vs HCC1395    | 775               | 772                   |
| SUM149PT vs MDA-MB-436 | 592               | 411                   |
| UWB1.289 vs HCC1395    | 601               | 719                   |
| UWB1.289 vs MDA-MB-436 | 405               | 309                   |
| Total events           | 2373              | 2211                  |

**Supplementary Table S2. Cell line therapy sensitivities.** Mean LC50 values ( $n = 3$ ) for cell lines treated with rucaparib, olaparib, cisplatin and taxol shown in Fig. 2B, were used to calculate fold changes in sensitivity, compared to MDA-MB-231 cells. Additionally, mean LC50 values ( $n = 3$ ) for SUM149PT and UWB1.289 cells with non-target (NT), BRCA1 shRNA #1 and #2 treated with rucaparib or cisplatin from Fig. 2E, were used to calculate fold changes in sensitivity compared to respective NT cells. *P* values (unpaired *t*-test) are provided in parenthesis.

| <b>Cell lines</b> | <b>Rucaparib (nM)</b> | <b>Olaparib (nM)</b> | <b>Cisplatin (ng/ml)</b> | <b>Taxol (nM)</b> |
|-------------------|-----------------------|----------------------|--------------------------|-------------------|
| MDA-MB-231        | 1                     | 1                    | 1                        | 1                 |
| MCF7              | 1.2 (0.389)           | 1.6 (0.067)          | 1.8 (0.0185)             | 2.1 (0.1056)      |
| MDA-MB-468        | 1.5 (0.1808)          | 1.4 (0.0791)         | 2 (0.0096)               | 2.7 (0.0496)      |
| L56Br-C1          | 4.9 (0.0043)          | 1.7 (0.031)          | 3.2 (0.0037)             | 0.6 (0.0323)      |
| SUM149PT          | 7.2 (0.003)           | 8.2 (0.0008)         | 5.9 (0.0013)             | 0.4 (0.0102)      |
| UWB1.289          | 9.1 (0.0027)          | 10.3 (0.0005)        | 4.2 (0.0021)             | 1.1 (0.7379)      |
| SUM1315           | 95.3 (0.0017)         | 3326.7 (0.0003)      | 10.3 (0.001)             | 1.1 (0.6838)      |
| HCC1395           | 200.5 (0.0016)        | 4216.9 (0.0003)      | 11.5 (0.0009)            | 0.4 (0.0072)      |
| MDA-MB-436        | 173.2 (0.0016)        | 11976 (0.0003)       | 21.4 (0.0008)            | 0.6 (0.0715)      |
| SUM149PT+NT       | 1                     |                      | 1                        |                   |
| SUM149PT+B1#1     | 12.2 (0.0082)         |                      | 2.1 (0.0455)             |                   |
| SUM149PT+B1#2     | 34.5 (0.0064)         |                      | 3.7 (0.0206)             |                   |
| UWB1.289+NT       | 1                     |                      | 1                        |                   |
| UWB1.289+B1#1     | 14.3 (0.0201)         |                      | 2.2 (0.0246)             |                   |
| UWB1.289+B1#2     | 26.7 (0.0177)         |                      | 2.7 (0.0153)             |                   |

**Supplementary Table S3. Hazard ratios for survival of patients with serous ovarian carcinomas associated with *BRCA1* mutation, age at diagnosis and stage (Fig. 5A).**

Data were evaluated for 1,712 participants and grouped according to whether mutations were located inside versus outside exon 11 (missense and intronic variants were excluded from the analyses). In a Cox regression model, adjusted for age at diagnosis, stage, study and year of diagnosis, the hazard ratio for participants with *BRCA1* frameshift mutations outside of exon 11 was 0.76 (95% CI, 0.61-0.94;  $P = 0.01$ ) and the hazard ratio for participants with frameshift mutations inside of exon 11 was 0.79 (95% CI, 0.57-1.09;  $P = 0.15$ ).

|                        | HR   | 95% CI      | <i>P</i> Value |
|------------------------|------|-------------|----------------|
| <i>BRCA 1</i> mutation |      |             |                |
| Noncarriers            | 1    | Referent    |                |
| FS outside of exon 11  | 0.76 | 0.61 – 0.94 | 0.01           |
| FS inside of exon 11   | 0.79 | 0.57 – 1.09 | 0.15           |
| Stage                  |      |             |                |
| Early                  | 1    | Referent    |                |
| Advanced               | 3.26 | 2.47 – 4.30 | <0.001         |
| Grade                  |      |             |                |
| Low                    | 1    | Referent    |                |
| High                   | 2.18 | 1.60 – 2.98 | <0.001         |
| Age at diagnosis       | 1.02 | 1.02 – 1.03 | <0.001         |

**Supplementary Table S4. Characteristics of studies included in survival analysis  
from Fig. 5A.**

| Study                                                                               | Study      | Country              | Noncarrier | <i>BRCA1</i> | Total     | Reference    |
|-------------------------------------------------------------------------------------|------------|----------------------|------------|--------------|-----------|--------------|
| Belgium Ovarian Cancer Study                                                        | BEL        | Belgium              | 12         | 8            | 20        | (9)          |
| Spanish National Cancer Centre                                                      | CNO        | Spain                | 11         | 4            | 15        | (10)         |
| Meir Hospital - Sapir Medical Center                                                | ISR        | Israel               | 32         | 9            | 41        | (11)         |
| Kathleen Cuningham Consortium for<br>Research into Familial Breast Cancer<br>MALOVA | KCO<br>MAL | Australia<br>Denmark | 28<br>255  | 56<br>12     | 84<br>267 | (12)<br>(13) |
| National Cancer Institute                                                           | NCI        | USA                  | 1          | 12           | 13        | (14)         |
| Royal Marsden Hospital                                                              | RMH        | UK                   | 41         | 15           | 56        | (15)         |
| Western General Hospital, Edinburgh                                                 | SCO        | UK                   | 26         | 10           | 36        | (16)         |
| The National Israeli Study of Ovarian<br>Cancer                                     | SIE        | Israel               | 355        | 120          | 475       | (17)         |
| Swedish Breast Cancer Study                                                         | SWE        | Sweden               | 13         | 19           | 32        | (18)         |
| The Cancer Genome Atlas                                                             | TCG        | USA                  | 268        | 22           | 290       | (19)         |
| University of California San Francisco                                              | UCS        | USA                  | 8          | 7            | 15        | (20)         |
| UK Gilda Radner Familial Ovarian<br>Cancer Registries                               | UKF        | UK                   | 45         | 34           | 79        | (21)         |
| Women's Cancer Program at Cedars<br>Sinai Medical Center                            | WCR        | USA                  | 238        | 51           | 289       | (22)         |
| Total                                                                               |            |                      | 1,333      | 379          | 1,712     |              |
