# Supplementary material
Source: PubMed Central journal article supplement (PMC4874568)
Supplement: NIHMS778404-supplement-7.pdf [file NIHMS778404-supplement-7.pdf]

**FOX1**  
**FOX2**  
 Consensus  
 Binding motif

**(U/A)GCAUG**

```

30421 tggatcctaa gtggaataa tctaggtaaa taggaattaa atgaaagagt atgagctaca
30481 tcttcagtat acttggtagt ttatgaggtt agtttctcta atatagccag ttggttgatt
30541 tccacctcca aggtgtatga agtatgtatt tttttaatga caattcagtt tttgagtacc
30601 ttgttatttt tgtatatttt cagctgcttg tgaattttct gagacggatg taacaaatac
30661 tgaacatcat caaccagta ataatgattt gaacaccact gagaagcgtg cagctgagag
30721 gcatccagaa aagtatcagg gtagttctgt ttcaaacttg catgtgggagc catgtggcac
30781 aaatactcat gccagctcat tacagcatga gaacagcagt ttattactca ctaaagacag
30841 aatgaatgta gaaaaggctg aattctgtaa taaaagcaaa cagcctggct tagcaaggag
30901 ccaacataac agatgggctg gaagtaagga aacatgtaat gataggcgga ctcccagcac
  
```

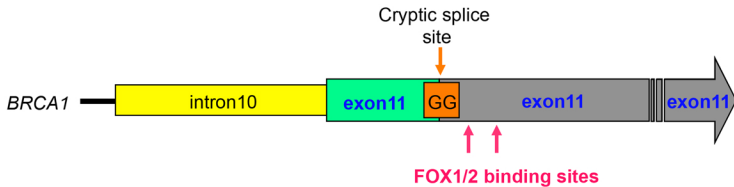

Figure S6
