# Supplementary material
Source: PubMed Central journal article supplement (PMC4874568)

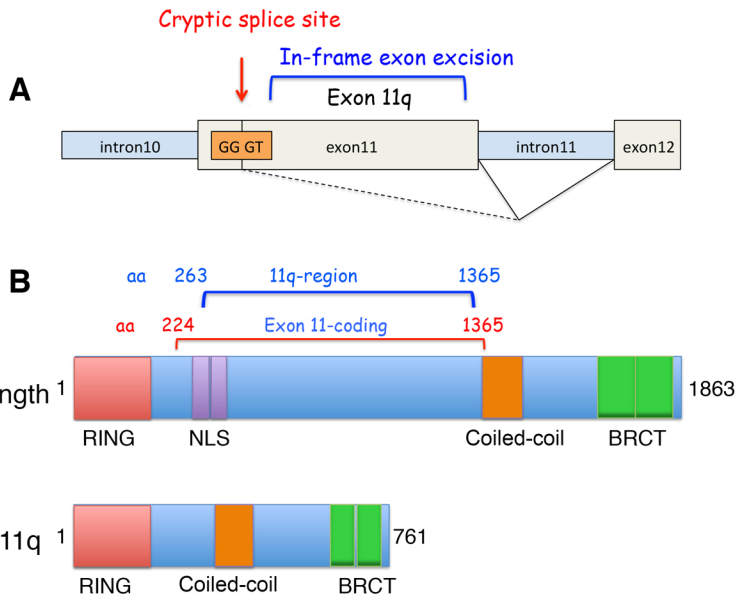

Figure S1

Supplement: NIHMS778404-supplement-2.pdf [file NIHMS778404-supplement-2.pdf]

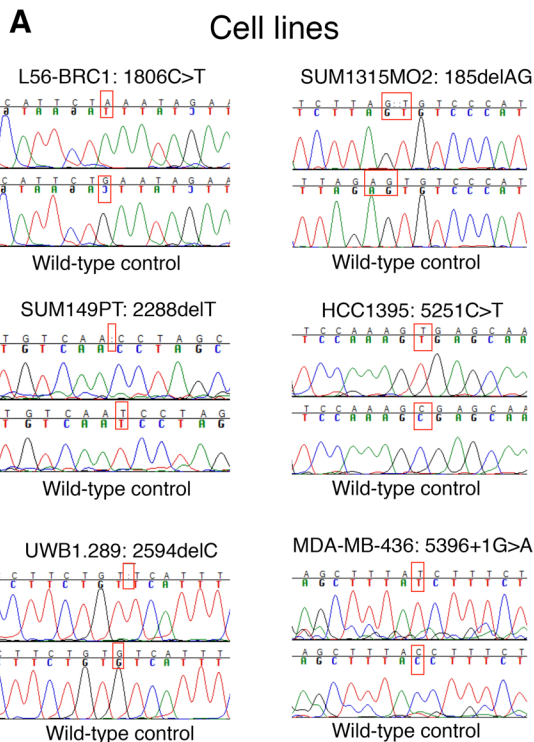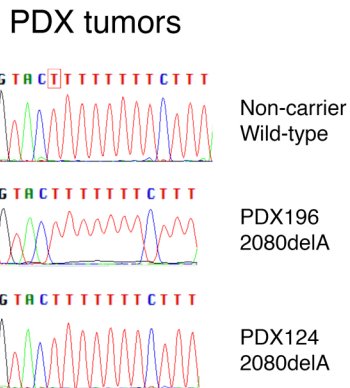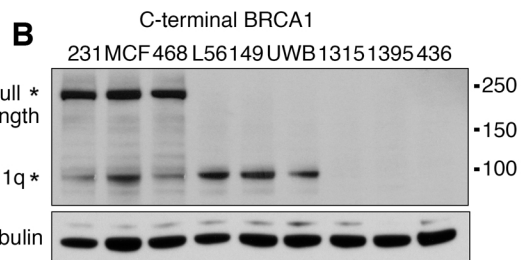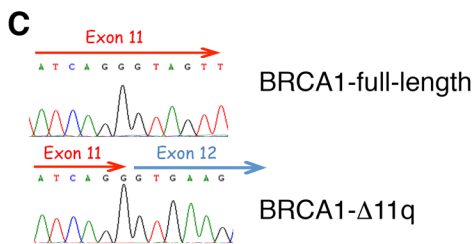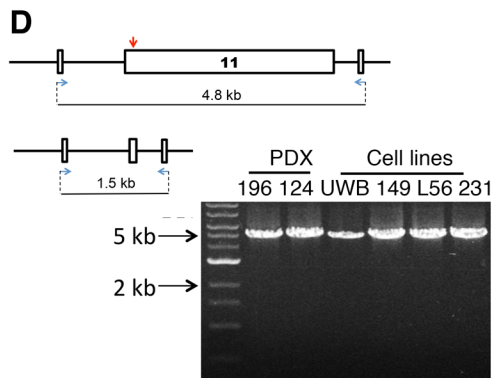

Figure S2

Supplement: NIHMS778404-supplement-3.pdf [file NIHMS778404-supplement-3.pdf]

# BRCA1-Minigene

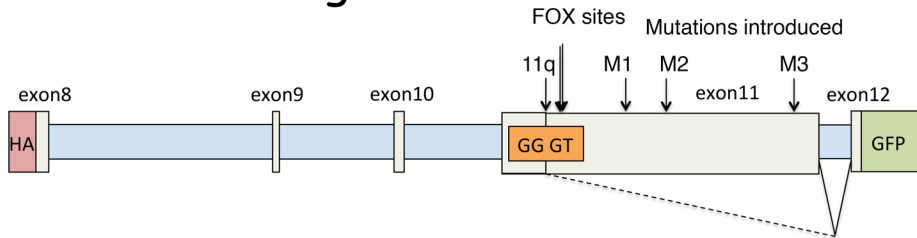

Figure S3

Supplement: NIHMS778404-supplement-4.pdf [file NIHMS778404-supplement-4.pdf]

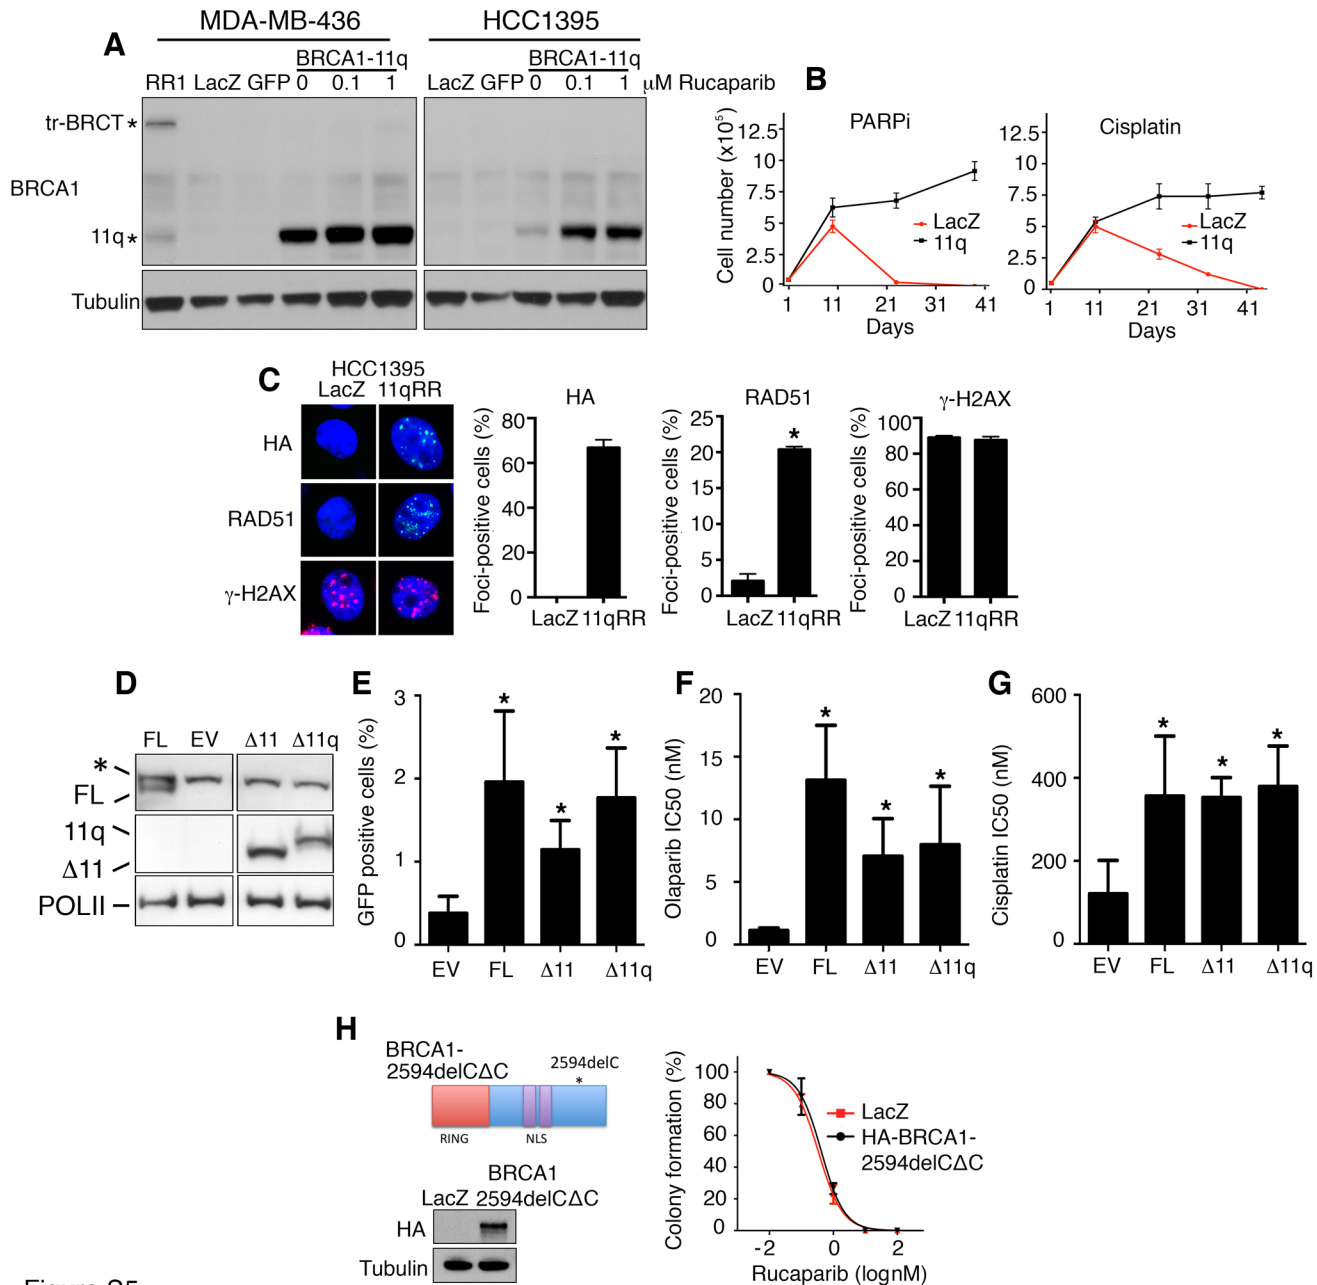

Figure S5

Supplement: NIHMS778404-supplement-6.pdf [file NIHMS778404-supplement-6.pdf]
